# Supplementary material for: LAILAPS-QSM: A RESTful API and JAVA library for semantic query suggestions
Source: PubMed Central journal article supplement (PMC5871001; doi:10.1371/journal.pcbi.1006058), 2018-03-12
Supplement: pcbi.1006058.s002.pdf [file pcbi.1006058.s002.pdf]

| original query        | suggested query             | ontology to compute $Sim_{Lin}$          | common subsumer                         | $Sim_{Lin}$ similarity |
|-----------------------|-----------------------------|------------------------------------------|-----------------------------------------|------------------------|
| salt stress           | salinity stress             | Gene Ontology                            | response to osmotic stress              | 0.97                   |
|                       | drought stress              |                                          | response to stress                      | 0.61                   |
|                       | abiotic stress              |                                          | response to stimulus                    | 0.79                   |
|                       | chilling stress             |                                          | response to stress                      | 0.61                   |
|                       | drought salt                |                                          | response to osmotic stress              | 1.00                   |
| drought tolerance     | chilling tolerance          | Gene Ontology                            | response to stress                      | 0.53                   |
|                       | salt tolerance              |                                          | response to stress                      | 0.58                   |
|                       | salinity tolerance          |                                          | response to stress                      | 0.55                   |
|                       | submergence tolerance       |                                          | response to abiotic stress              | 0.84                   |
|                       | cold tolerance              |                                          | response to stress                      | 0.56                   |
| grain yield           | seed yield                  | Trait Ontology                           | yield trait                             | 0.67                   |
|                       | tuber yield                 |                                          | plant trait                             | 0.58                   |
|                       | panicle grain               |                                          | yield trait                             | 0.59                   |
|                       | tillering                   |                                          | yield trait                             | 0.66                   |
|                       | tiller number               |                                          | yield trait                             | 0.64                   |
| male sterility        | pollen sterility            | Trait Ontology                           | sterility related trait                 | 0.84                   |
|                       | sterility                   |                                          | plant trait                             | 0.65                   |
|                       | female sterility            |                                          | sterility related trait                 | 0.85                   |
|                       | sterility cms               |                                          | sterility related trait                 | 0.85                   |
|                       | pollen fertility            |                                          | sterility related trait                 | 0.86                   |
| alcohol dehydrogenase | aldehyde dehydrogenase      | Gene Ontology                            | oxidoreductase activity                 | 0.89                   |
|                       | mannitol dehydrogenase      |                                          | oxidoreductase activity                 | 0.81                   |
|                       | dehydrogenase adh           |                                          | oxidoreductase activity                 | 1.0                    |
|                       | 1.2.1.3                     |                                          | oxidoreductase activity                 | 0.89                   |
|                       | xanthine dehydrogenase      |                                          | oxidoreductase activity                 | 0.81                   |
| dextrins              | limit dextrins              | Chemical Entities of Biological Interest | polysaccharide                          | 0.68                   |
|                       | maltooligosaccharides       |                                          | chemical entity                         | 0.55                   |
|                       | arabinoxylan                |                                          | polysaccharide                          | 0.74                   |
|                       | amylopectin                 |                                          | molecular entity                        | 0.53                   |
|                       | arabinoxylans               |                                          | polysaccharide                          | 0.71                   |
| wheat                 | triticum aestivum           | UniProt Taxonomy                         | triticum                                | 1.00                   |
|                       | maize                       |                                          | poaceae                                 | 0.41                   |
|                       | aestivum                    |                                          | triticum                                | 1.00                   |
|                       | rye                         |                                          | triticeae                               | 0.62                   |
|                       | soybean                     |                                          | mesangiospermae                         | 0.16                   |
| Zea mays              | maize                       | UniProt Taxonomy                         | zea                                     | 1.00                   |
|                       | aestivum wheat              |                                          | poaceae                                 | 0.39                   |
|                       | cereale rye                 |                                          | triticum                                | 0.58                   |
|                       | medicago sativa             |                                          | mesangiospermae                         | 0.16                   |
|                       | sativa rice                 |                                          | poaceae                                 | 0.40                   |
| Oryza glaberrima      | glaberrima african          | UniProt Taxonomy                         | oryza                                   | 1.00                   |
|                       | glaberrima steud            |                                          | oryza                                   | 1.00                   |
|                       | oryza barthii               |                                          | oryza                                   | 0.72                   |
|                       | sativa indica               |                                          | oryza                                   | 0.72                   |
|                       | sativa ssp                  |                                          | mesangiospermae                         | 0.15                   |
| sucrose synthesis     | starch sucrose              | Gene Ontology                            | cellular carbohydrate metabolic process | 0.74                   |
|                       | sucrose starch              |                                          | cellular carbohydrate metabolic process | 0.74                   |
|                       | sucrose hexose              |                                          | sucrose metabolic process               | 0.65                   |
|                       | galactolipid synthesis      |                                          | cellular biosynthetic process           | 0.70                   |
|                       | enzymes calvin              |                                          | carbohydrate biosynthetic process       | 0.80                   |
| sucrose transporter   | monosaccharide transporter  | Gene Ontology                            | carbohydrate transport                  | 0.82                   |
|                       | sucrose transporters        |                                          | disaccharide transport                  | 1.00                   |
|                       | monosaccharide transporters |                                          | carbohydrate transport                  | 0.83                   |
| photosynthesis        | photorespiration            | Gene Ontology                            | cellular metabolic process              | 0.66                   |
|                       | stomatal conductance        |                                          | cellular process                        | 0.68                   |
|                       | photosynthetic co2          |                                          | cellular metabolic process              | 0.62                   |
|                       | co2 fixation                |                                          | metabolic process                       | 0.66                   |
|                       | acclimation photosynthetic  |                                          | biological process                      | 0.60                   |
| terpene synthesis     | indole terpenoid            | Gene Ontology                            | organic substance metabolic process     | 0.47                   |
|                       | galactolipid synthesis      |                                          | lipid biosynthetic process              | 0.99                   |
|                       | mevalonate methylerythritol |                                          | isoprenoid biosynthetic process         | 0.88                   |
|                       | glucosinolate biosynthetic  |                                          | cellular biosynthetic process           | 0.47                   |
|                       | triterpene biosynthetic     |                                          | isoprenoid biosynthetic process         | 0.89                   |
| leaf rust             | stripe rust                 | Trait Ontology                           | fungal disease resistance               | 0.71                   |
|                       | stem rust                   |                                          | fungal disease resistance               | 0.70                   |
|                       | rust resistance             |                                          | fungal disease resistance               | 0.71                   |
|                       | rust wheat                  |                                          | fungal disease resistance               | 0.65                   |
|                       | rust stripe                 |                                          | fungal disease resistance               | 0.65                   |
| acetolactate synthase | isochorismate synthase      | Gene Ontology                            | catalytic activity                      | 0.60                   |
|                       | anthranilate synthase       |                                          | catalytic activity                      | 0.63                   |
|                       | linalool synthase           |                                          | catalytic activity                      | 0.58                   |
|                       | galactinol synthase         |                                          | transferase activity                    | 0.67                   |
|                       | malate synthase             |                                          | transferase activity                    | 0.70                   |
